# Supplementary material for: Ubiquitin specific peptidase 5 regulates colorectal cancer cell growth by stabilizing Tu translation elongation factor
Source: PubMed Central journal article supplement — Theranostics. 2019 May 31;9(14):4208–20. doi: 10.7150/thno.33803 (PMC6592179; doi:10.7150/thno.33803), 2019-05-31
Supplement: thnov09p4208s1.pdf [file thnov09p4208s1.pdf]

## Supplemental tables

**Table S1. The detail information of the lentivirus library**

| <b>Gene name</b> | <b>shRNA-derived lentivirus number</b> |
|------------------|----------------------------------------|
| Ctrl             | Negative control (Non-targeting shRNA) |
| PC               | Oncogene X specific-targeting shRNA    |
| OTUB2            | PSC40498mix                            |
| USP6             | PSC49026mix                            |
| USP34            | PSC49023mix                            |
| USP7             | PSC49020mix                            |
| USP9X            | PSC49014mix                            |
| PAN2 (USP52)     | PSC49011mix                            |
| UCHL5            | PSC49005mix                            |
| USP29            | PSC48993mix                            |
| Cyld             | PSC48990mix                            |
| OTUD7B (Cezanne) | PSC48984mix                            |
| USP5             | PSC49032mix                            |
| USP32            | PSC48987mix                            |
| USP3             | PSC49035mix                            |
| USP24            | PSC48999mix                            |
| USP1             | PSC49038mix                            |
| USP33            | PSC49029mix                            |
| Mpnd             | PSC49017mix                            |
| USP21            | PSC49002mix                            |
| USP15            | PSC49008mix                            |
| OTUD4            | PSC48996mix                            |

**Table S2. The primers for PCR amplification of the regulatory regions of USP5**

| <b>Regulatory<br/>sequence Region</b> | <b>Primer<br/>Direction</b> | <b>Sequences (5'-3')</b>                |
|---------------------------------------|-----------------------------|-----------------------------------------|
| -2000/+32                             | Forward                     | <b>GGGGTACCTGCCACCGTGCTTTTGTGTGTGT</b>  |
|                                       | Reverse                     | <b>CCCAAGCTTGACACCGGCAGCAGCTTCTCC</b>   |
| -1500/+32                             | Forward                     | <b>GGGGTACCTCCTCCCCATATTCCAGGAAG</b>    |
|                                       | Reverse                     | <b>CCCAAGCTTGACACCGGCAGCAGCTTCTCC</b>   |
| -1000/+32                             | Forward                     | <b>GGGGTACCGCAGCTGACAAAATGGCTCGTTC</b>  |
|                                       | Reverse                     | <b>CCCAAGCTTGACACCGGCAGCAGCTTCTCC</b>   |
| -500/+32                              | Forward                     | <b>GGGGTACCGATAGTAGCTTTATTGGTTGAC</b>   |
|                                       | Reverse                     | <b>CCCAAGCTTGACACCGGCAGCAGCTTCTCC</b>   |
| -300/+32                              | Forward                     | <b>GGGGTACCTGGACTCTAAGGGTCCCGGAGC</b>   |
|                                       | Reverse                     | <b>CCCAAGCTTGACACCGGCAGCAGCTTCTCC</b>   |
| -230/+32                              | Forward                     | <b>GGGGTACCGCTGCTCTACGTGCGCTCCCG</b>    |
|                                       | Reverse                     | <b>CCCAAGCTTGACACCGGCAGCAGCTTCTCC</b>   |
| -160/+32                              | Forward                     | <b>GGGGTACCGCTTCTCATTGGCGTCAGTCA</b>    |
|                                       | Reverse                     | <b>CCCAAGCTTGACACCGGCAGCAGCTTCTCC</b>   |
| -100/+32                              | Forward                     | <b>GGGGTACCCCAACTGCCATTCTCGCGCGTCGT</b> |
|                                       | Reverse                     | <b>CCCAAGCTTGACACCGGCAGCAGCTTCTCC</b>   |
| -74/+32                               | Forward                     | <b>GGGGTACCCCGCGGCGCATGCCCTA</b>        |
|                                       | Reverse                     | <b>CCCAAGCTTGACACCGGCAGCAGCTTCTCC</b>   |
| -230/-75                              | Forward                     | <b>GGGGTACCGCTGCTCTACGTGCGCTCCCG</b>    |
|                                       | Reverse                     | <b>CCCAAGCTTAGACGACGCGGAGAATGGCA</b>    |

**Table S3. Multivariable OS analyses for USP5 expression in CRC cells in CRC patients**

|               | OS                  |               |
|---------------|---------------------|---------------|
|               | HR (95%CI)          | <i>p</i>      |
| USP5 Positive | 2.148(1.032-4.624)  | <b>0.041*</b> |
| Age           | 1.035(1.006-1.065)  | <b>0.017*</b> |
| Gender        | 0.815(0.395-1.682)  | 0.581         |
| M stage       | 3.589(1.244-10.358) | <b>0.018*</b> |

NOTE: Multivariable analysis adjusted for age, gender, M stages. \* $p < 0.05$ .

## Supplemental figures and figure legends

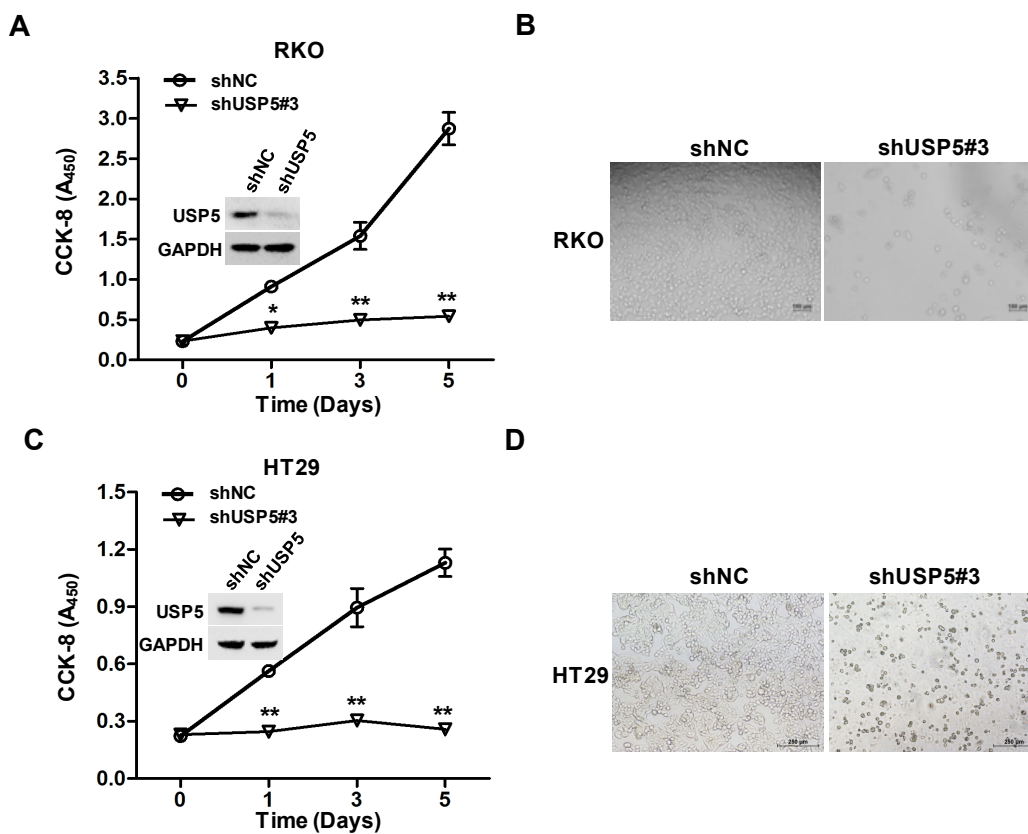

**Figure S1. Knockdown of USP5 inhibits cell growth in RKO and HT29 cells. A & B.** RKO cells were stably infected with lentiviral shUSP5#3 or control, followed by CCK-8 staining at day 0, 2, 4 and 6 (A). Immunoblotting assay was also performed against USP5 and GAPDH at day 5 (A). At the end of the experiment, the photos were taken (B). **C & D.** HT29 cells were stably infected with lentiviral shUSP5#3 or control, followed by CCK-8 staining at day 0, 2, 4 and 6 (C). Immunoblotting assay was also performed against USP5 and GAPDH at day 5 (C). At the end of the experiment, the photos were taken (D). \*  $p < 0.01$ ; \*\*  $p < 0.01$ .

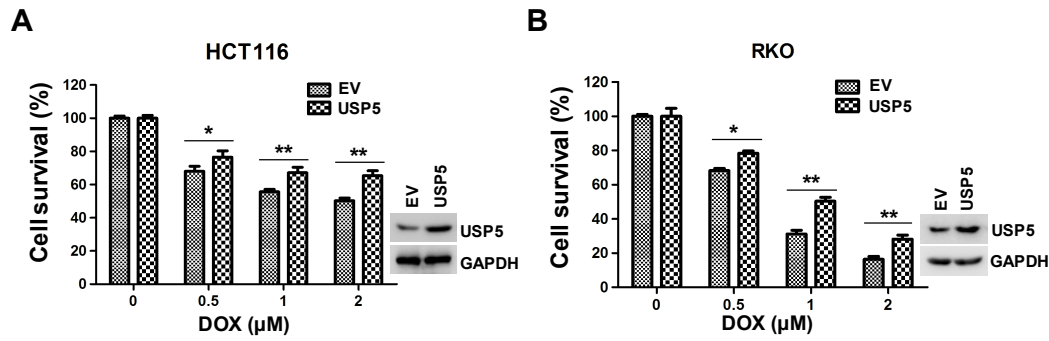

**Figure S2. Overexpression of USP5 decreases the sensitivity of doxorubicin to colorectal cancer cells. A & B.** Empty vector (EV) or USP5 plasmids were transfected into HCT116 (A) or RKO cells (B). Twenty-four hours later, the cells were treated with indicated concentrations of doxorubicin (DOX) overnight and then evaluated by CCK-8 assay or prepared for immunoblotting analysis.

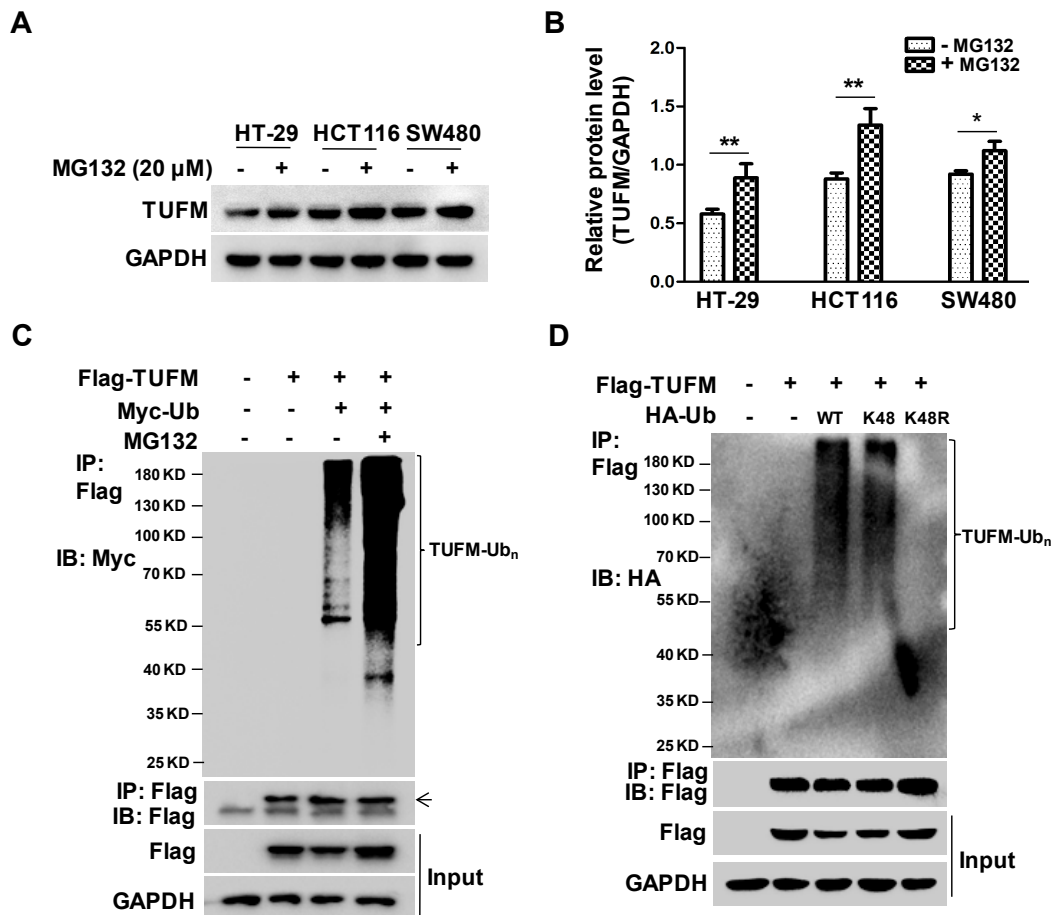

**Figure S3. MG132 upregulates endogenous TUFM expression in colorectal**

**cancer cells, and TUFM ubiquitination was mediated by Ub-K48.** **A.** HT-29, HCT116 and SW480 cells were treated by 20  $\mu\text{M}$  MG132 for 6 hours, and then cells were prepared for immunoblotting against TUFM. GAPDH was used as a loading control. **B.** Statistically analysis of Figure A (mean  $\pm$  SD). **C.** HEK293T cells were transfected with Flag-TUFM or Myc-Ub. Twenty-four hours later, cells were treated with 20  $\mu\text{M}$  MG132 for 6 hours, and cells were prepared for co-immunoprecipitation to detect the protein ubiquitination of TUFM. Whole cell lysates were used for immunoblotting against Flag and GAPDH. **D.** HEK293T cells were transfected with Flag-TUFM, HA-Ub-WT, HA-Ub-K48 or HA-Ub-K48R. Thirty-six hours later, cells were prepared for co-immunoprecipitation to detect the protein ubiquitination of TUFM. Whole cell lysates were used for immunoblotting against Flag and GAPDH.

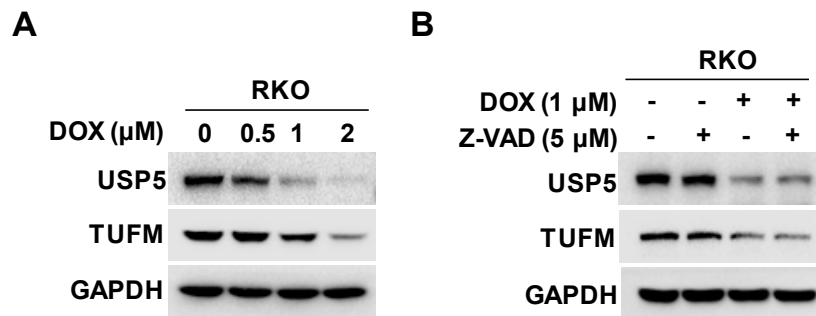

**Figure S4. Doxorubicin inhibits USP5-TUFM axis.** **A.** RKO cells were treated with doxorubicin (DOX) for 24 hours, and then cells were prepared for immunoblotting against USP5, TUFM and GAPDH. **B.** RKO cells were treated with DOX or Caspase inhibitor Z-VAD for 24 hours, followed by immunoblotting against USP5 and TUFM. GAPDH was used as a loading control.

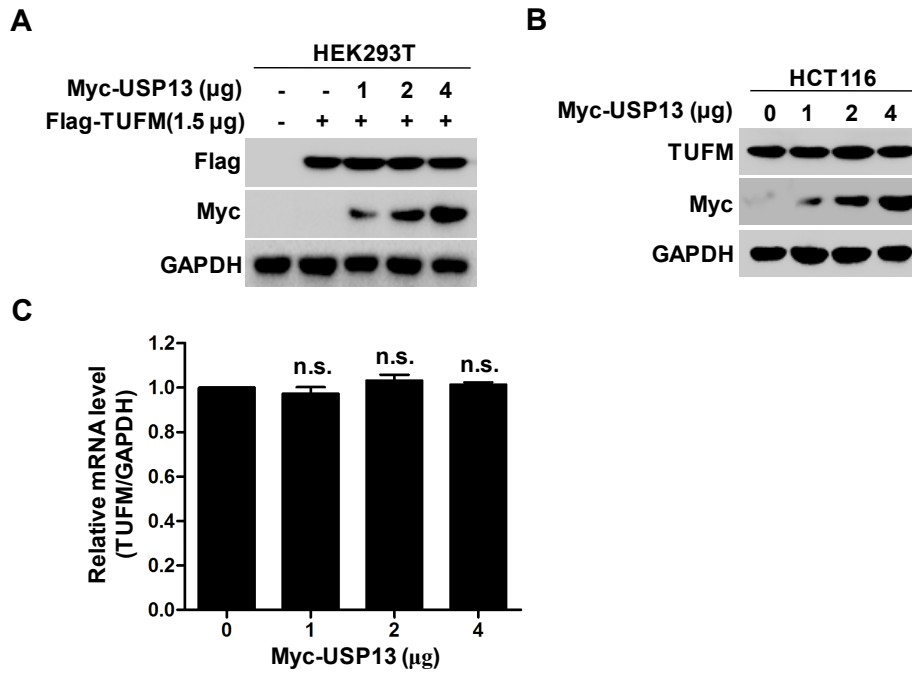

**Figure S5. USP13 does not play roles in TUFM stabilization.** **A.** Myc-USP13 and Flag-TUFM were co-transfected into HEK293T cells. Twenty-four hours later, cells were prepared for immunoblotting analysis against Flag, Myc and GAPDH. **B & C.** HCT116 cells were transfected with increased Myc-USP13 plasmids, followed by immunoblotting against TUFM, Myc and GAPDH (B), or qRT-PCR against TUFM and GAPDH (C).
